# Supplementary material
Source: publisher site journal article supplement (https://static.cambridge.org/content/id/urn:cambridge.org:id:article:S1471068419000036/resource/name/S1471068419000036supp001.pdf)
Supplement: Supplementary file 1 [file S1471068419000036supp001.pdf]

## Appendix A Experiments on Automatic Optimization

In Section 5 we discussed the results of tests over the benchmark suite from the 6th ASP Competition. It is worth noting that many domains have been included in several subsequent editions of the ASP Competition series; over the years, the participant teams have iteratively fine-tuned the encodings with the aim of maximizing performance of competing ASP systems. This led, in the case of 6th Competition, to a bunch of programs that are already optimized for ASP computation, thus limiting the room for further improvements.

On the one hand, such considerations strengthen the positive results reported in Section 5; on the other hand, one might wonder about what is the impact of the SMARTDECOMPOSITION algorithm when dealing with less refined encodings. We find such inquiry of interest, as it should be in the spirit of the declarative nature of ASP to allow developers to concentrate on knowledge representation rather than on low-level performance issues, that also lead, in some cases, to the production of encodings rather involved and less “human readable”. This is why, in addition to the experiments reported in Section 5, we tested our approach also on benchmarks coming from older editions of the ASP Competition series. In particular, we considered the 4th Competition, as it is the farthest in time in which encodings comply to the ASP-Core-2 input language standard.

In this set of experiments we measured grounding times of the same three versions of  $\mathcal{S}$ -DLV already taken into account in Section 5, within the same experimental environment (hardware, software, memory and time limits). Table A 1 shows the results; problem names reported in italic denotes domains which are in common between the 4th and the 6th Competition, while those marked with a ‘\*’ symbol feature more optimized encodings in the 6th. As expected, in this scenario the positive impact of SMARTDECOMPOSITION is even more evident:  $\mathcal{S}$ -DLV<sup>SD</sup> grounds a larger number of instances in a significant smaller average time. Intuitively, the less an encoding is fine-tuned, the highest are likely to be the benefits stemming from a careful automatic rewriting of input rules.

Furthermore, for all problems in common between the two ASP competitions herein considered, we tested the systems over the programs obtained by coupling the encodings featured by the 4th with the instances featured by the 6th, and vice-versa. This should provide us with further information about the impact of both “manual” optimizations and the ones coming from our automatic method. Intuitively, an encoding may be optimized in different ways, and not necessarily by means of a syntactic modification of rules; for instance, one can push additional information about the domain at hand into the encoding, possibly with constraints, in order to reduce the search space. The results are reported in Table A 2. It is clear that, as one can expect, the best combination is given by  $\mathcal{S}$ -DLV<sup>SD</sup> fed with optimized encoding coming from 6th Competition. However, some interesting considerations can be made: indeed, in several cases (for instance, *Permutation Pattern Marching*, both over instances from the 4th, and, even more, over instances from the 6th, that appear to be harder), the smart decomposition guarantees similar or better performance improvements in grounding times that are obtained by the manual tuning.

## Appendix B Additional Experiments

We report next the results of an additional experimental evaluation over a further set of benchmark. We take into account problem domains that have been already used for assessing performance of ASP systems in other works; in particular, we considered the domains *Cutedge*, *Graph*

Table A 1: 4th Competition – Grounding Benchmarks: number of grounded instances and average running times (in seconds). US indicates that corresponding configurations do not support the adopted syntax.

| Problem                         | #inst. | $\mathcal{I}$ -DLV |        | <i>lpopt</i>   $\mathcal{I}$ -DLV |        | $\mathcal{I}$ -DLV <sup>SD</sup> |        |
|---------------------------------|--------|--------------------|--------|-----------------------------------|--------|----------------------------------|--------|
|                                 |        | #grounded          | time   | #grounded                         | time   | #grounded                        | time   |
| Abstract Dialectical Frameworks | 30     | 30                 | 0.13   | 30                                | 0.13   | 30                               | 0.13   |
| Bottle Filling Problem          | 30     | 30                 | 4.12   | 30                                | 6.86   | 30                               | 4.39   |
| Chemical Classification         | 30     | 30                 | 87.81  | 30                                | 403.38 | 30                               | 88.22  |
| Complex Optimization *          | 29     | 29                 | 36.28  | 29                                | 38.39  | 29                               | 36.07  |
| Connected Still Life *          | 10     | 10                 | 0.12   | 10                                | 0.13   | 10                               | 0.15   |
| Crossing Minimization *         | 30     | 30                 | 0.10   | 30                                | 0.10   | 30                               | 0.10   |
| Graceful Graphs                 | 30     | 30                 | 0.37   | 30                                | 0.39   | 30                               | 0.37   |
| Graph Colouring *               | 30     | 30                 | 0.10   | 30                                | 0.10   | 30                               | 0.10   |
| Hanoi Tower                     | 30     | 30                 | 0.22   | 30                                | 0.23   | 30                               | 0.30   |
| Incremental Scheduling *        | 30     | 12                 | 297.95 | 17                                | 229.49 | 21                               | 221.17 |
| Knight Tour with Holes *        | 30     | 20                 | 176.99 | 20                                | 181.16 | 20                               | 178.59 |
| Labyrinth                       | 30     | 30                 | 1.49   | 30                                | 1.40   | 30                               | 1.51   |
| Maximal Clique *                | 30     | 30                 | 0.34   | 30                                | 1.11   | 30                               | 0.34   |
| Minimal Diagnosis *             | 30     | 30                 | 2.54   | 30                                | 2.20   | 30                               | 2.57   |
| Nomystery *                     | 30     | 30                 | 34.91  | 21                                | 100.14 | 30                               | 35.28  |
| Permut. Pattern Matching *      | 30     | 28                 | 57.71  | 30                                | 3.64   | 30                               | 62.32  |
| Qualitative Spatial Reasoning * | 30     | 30                 | 2.85   | 30                                | 2.87   | 30                               | 2.84   |
| Reachability                    | 30     | 30                 | 101.93 | 0                                 | US     | 30                               | 102.04 |
| Ricochet Robots                 | 30     | 30                 | 0.27   | 30                                | 0.31   | 30                               | 0.31   |
| Sokoban                         | 30     | 30                 | 2.65   | 30                                | 2.68   | 30                               | 2.69   |
| Solitaire                       | 27     | 27                 | 0.13   | 27                                | 0.18   | 27                               | 0.20   |
| Stable Marriage *               | 30     | 30                 | 28.35  | 30                                | 2.65   | 30                               | 2.46   |
| Strategic Companies             | 30     | 30                 | 0.19   | 0                                 | US     | 30                               | 0.19   |
| Valves Location                 | 30     | 30                 | 3.97   | 30                                | 3.98   | 30                               | 3.93   |
| Visit-all *                     | 30     | 30                 | 0.13   | 30                                | 0.14   | 30                               | 0.13   |
| Weighted-Sequence Problem *     | 30     | 30                 | 2.87   | 30                                | 9.61   | 30                               | 2.95   |
| Total Grounded Instances        |        | 726/756            |        | 664/756                           |        | 737/756                          |        |

*Scol*, *Ground Explosion 2*, *Reach* (Weinzierl 2017) and *TimeTabling* (Perri et al. 2007; Calimeri et al. 2008; Perri et al. 2013).

Table B 1 reports grounding times of the same three versions of  $\mathcal{I}$ -DLV already taken into account in Section 5, within the same experimental environment (hardware, software, memory and time limits). We first note that, regarding *Reach*, even if the problem domain is the same as *Reachability* of Section 5, both encoding and instances are different, as they are taken from (Weinzierl 2017), and do not feature queries. In this case, where decomposition is not applicable because of the rule structure, results show that the use of SMARTDECOMPOSITION, as previously noted, allows us to avoid the overhead due to the invocation of *lpopt*. On the overall, again, one can observe the positive impact of SMARTDECOMPOSITION over grounding times, that allows significant performance improvements in case of *Cutedge* and *TimeTabling*, where  $\mathcal{I}$ -DLV<sup>SD</sup> times are 97% and 33% lower, respectively, w.r.t.  $\mathcal{I}$ -DLV.

Table A 2: Variation of the encodings – Grounding Benchmarks: number of grounded instances and average running times (in seconds).

| Problem                   | #inst. | $\mathcal{I}$ -DLV |                | $\mathcal{I}$ -DLV <sup>SD</sup> |                |
|---------------------------|--------|--------------------|----------------|----------------------------------|----------------|
|                           |        | #grounded          | time           | #grounded                        | time           |
| 4th Competition Instances |        |                    |                |                                  |                |
|                           |        | 4th Comp. Enc.     | 6th Comp. Enc. | 4th Comp. Enc.                   | 6th Comp. Enc. |
| Incr. Scheduling          | 30     | 12 297.95          | 30 54.65       | 21 221.17                        | 30 1.93        |
| Maximal Clique            | 30     | 30 0.34            | 30 2.96        | 30 0.34                          | 30 3.11        |
| Minimal Diagnosis         | 30     | 30 2.54            | 30 1.76        | 30 2.57                          | 30 1.76        |
| Nomystery                 | 30     | 30 34.91           | 30 47.24       | 30 35.28                         | 30 47.11       |
| Perm. Pattern Match.      | 30     | 28 57.71           | 30 0.27        | 30 62.32                         | 30 0.27        |
| Stable Marriage           | 30     | 30 28.35           | 30 3.16        | 30 2.46                          | 30 2.86        |
| 6th Competition Instances |        |                    |                |                                  |                |
|                           |        | 4th Comp. Enc.     | 6th Comp. Enc. | 4th Comp. Enc.                   | 6th Comp. Enc. |
| Incr. Scheduling          | 20     | 11 336.77          | 20 16.07       | 19 211.61                        | 20 16.21       |
| Maximal Clique            | 20     | 20 6.63            | 20 4.93        | 20 6.58                          | 20 4.96        |
| Minimal Diagnosis         | 20     | 20 4.12            | 20 5.09        | 20 4.14                          | 20 4.22        |
| Nomystery                 | 20     | 20 55.11           | 20 3.45        | 20 43.74                         | 20 3.63        |
| Perm. Pattern Match.      | 20     | 16 168.93          | 20 130.47      | 20 150.99                        | 20 4.21        |
| Stable Marriage           | 20     | 0 TO               | 20 118.55      | 20 172.68                        | 20 119.53      |

Table B 1: Additional Grounding Benchmarks: number of grounded instances and average running times (in seconds).

| Problem                | #inst. | $\mathcal{I}$ -DLV |       | $lpopt$   $\mathcal{I}$ -DLV |       | $\mathcal{I}$ -DLV <sup>SD</sup> |       |
|------------------------|--------|--------------------|-------|------------------------------|-------|----------------------------------|-------|
|                        |        | #grounded          | time  | #grounded                    | time  | #grounded                        | time  |
| Cutedge                | 130    | 130                | 34.38 | 130                          | 1.64  | 130                              | 1.08  |
| Graph 5col             | 180    | 180                | 0.12  | 180                          | 0.14  | 180                              | 0.12  |
| Ground Explosion 2     | 17     | 7                  | 73.33 | 7                            | 73.02 | 7                                | 72.87 |
| Reach                  | 50     | 50                 | 0.29  | 50                           | 0.76  | 50                               | 0.30  |
| TimeTabling            | 27     | 27                 | 85.57 | 27                           | 63.67 | 27                               | 57.67 |
| Total Solved Instances |        | <b>367/377</b>     |       | <b>367/377</b>               |       | <b>367/377</b>                   |       |
